# Supplementary material for: Acute Adverse Effects of Metallic Nanomaterials on Cardiac and Behavioral Changes in Daphnia magna
Source: MDPI journal article supplement (doi:10.3390/environments9020026), 2022-02-10
Supplement: s1 [file s1]

**Supplementary Materials**

**Acute adverse effects of metallic nanomaterials on cardiac and behavioral changes in *Daphnia magna***

**Jihoon Park<sup>1,2</sup>, Chang Gyun Park<sup>2</sup>, Baeckkyoung Sung<sup>2,3</sup>, Yong Oh Lee<sup>4</sup>,**

**Chang Seon Ryu<sup>2</sup>, Ja Young Park<sup>2\*</sup>, Young Jun Kim<sup>2,3</sup>**

<sup>1</sup> Accident Response Coordination Division, National Institute of Chemical Safety, Ministry of Environment, Cheongju, Republic of Korea

<sup>2</sup> Environmental Safety Group, Korea Institute of Science and Technology Europe Forschungsgesellschaft mbH, Saarbrücken, Germany

<sup>3</sup> Division of Energy & Environment Technology, University of Science & Technology, Daejeon, Republic of Korea

<sup>4</sup> Smart Convergence Group, Korea Institute of Science and Technology Europe Forschungsgesellschaft mbH, Saarbrücken, Germany

**\*Corresponding author: Dr. Ja Young Park<sup>1</sup>**

Environmental Safety Group, Korea Institute of Science and Technology Europe  
Forschungsgesellschaft mbH, 66123 Saarbrücken, Germany

E-mail address: pjy0404@gmail.com

## **List of contents**

|                                                                                                                                 |    |
|---------------------------------------------------------------------------------------------------------------------------------|----|
| <b>Figure S1.</b> Temporal variation of swimming speed by titanium dioxide (TiO <sub>2</sub> ) level and exposure duration..... | S1 |
| <b>Figure S2.</b> Temporal variation of swimming speed by silver nanoparticles (AgNPs) level and exposure duration.....         | S2 |
| <b>Figure S3.</b> Temporal variation of swimming speed by silver ion (Ag <sup>+</sup> ) level and exposure duration .....       | S3 |

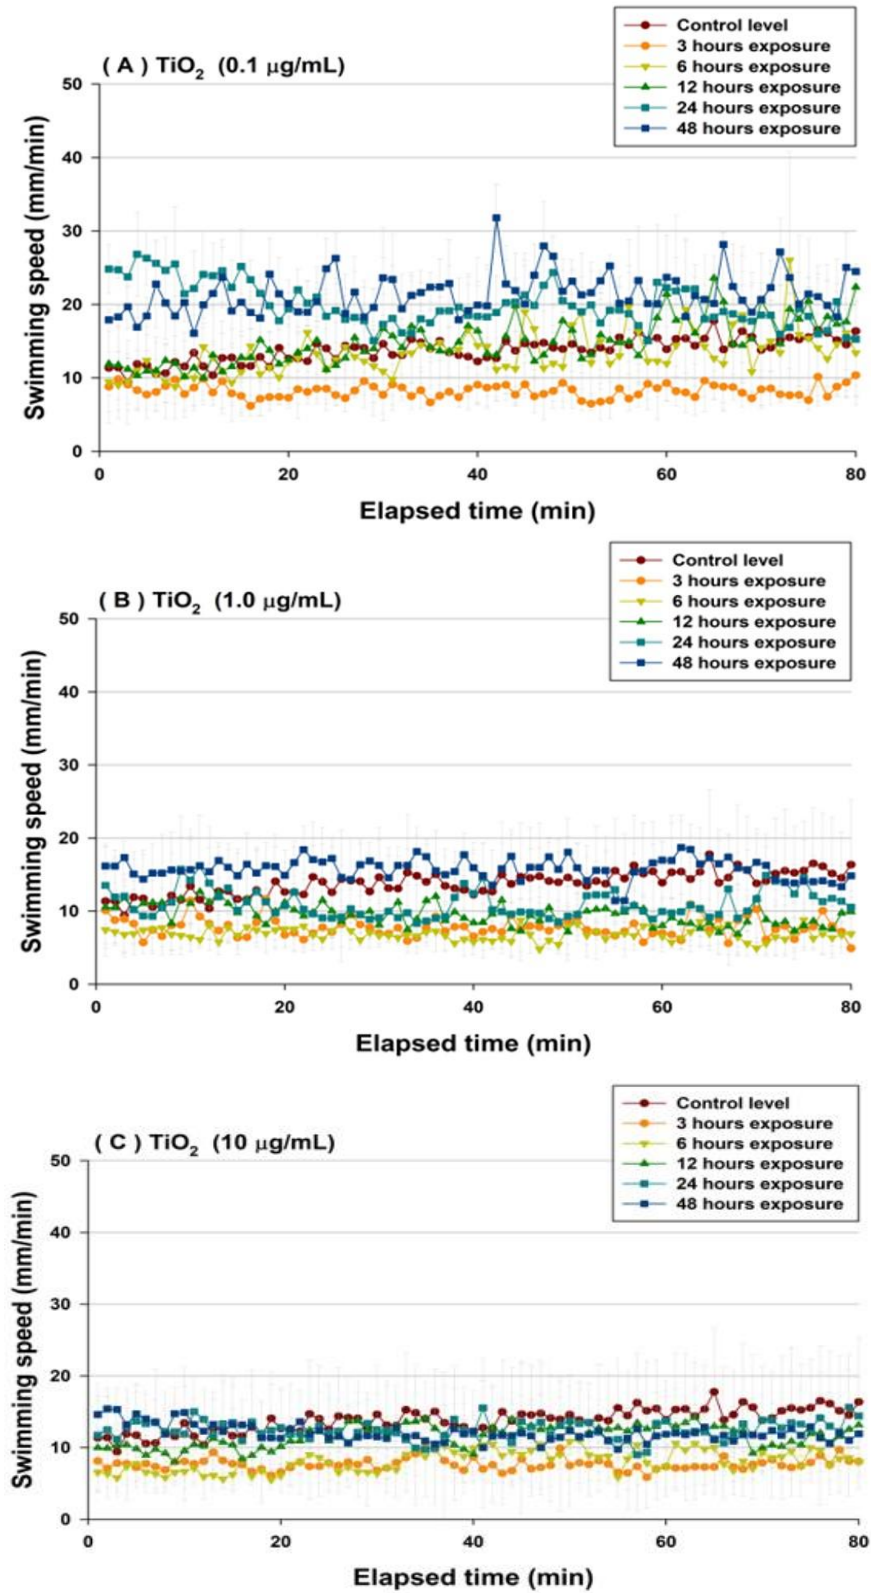

**Figure S1.** Temporal variation of swimming speed by titanium dioxide (TiO<sub>2</sub>) level and exposure duration.

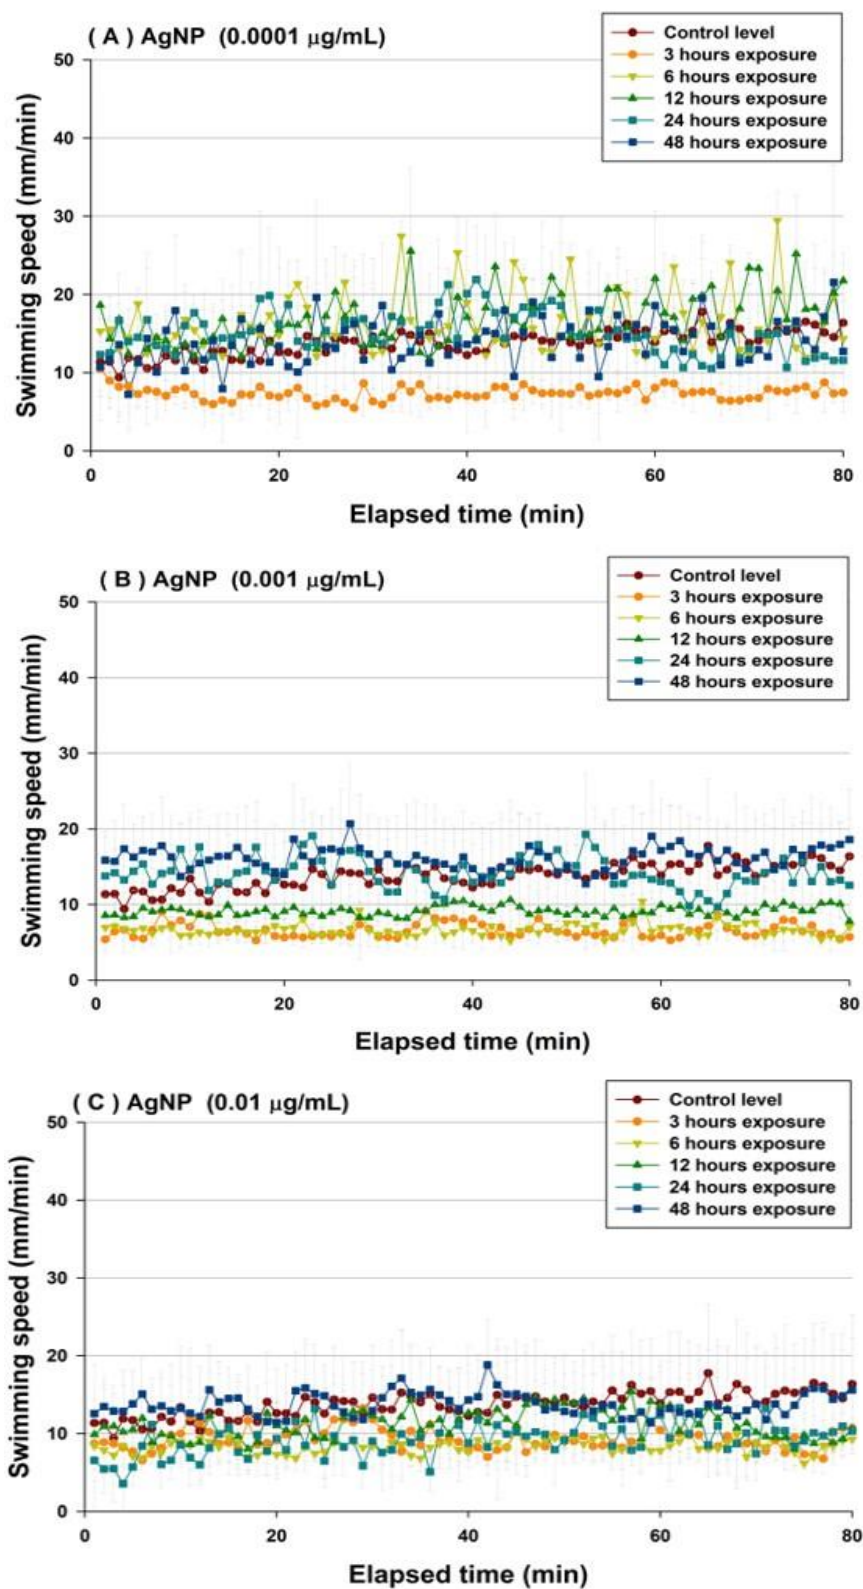

**Figure S2.** Temporal variation of swimming speed by silver nanoparticles (AgNPs) level and exposure duration.

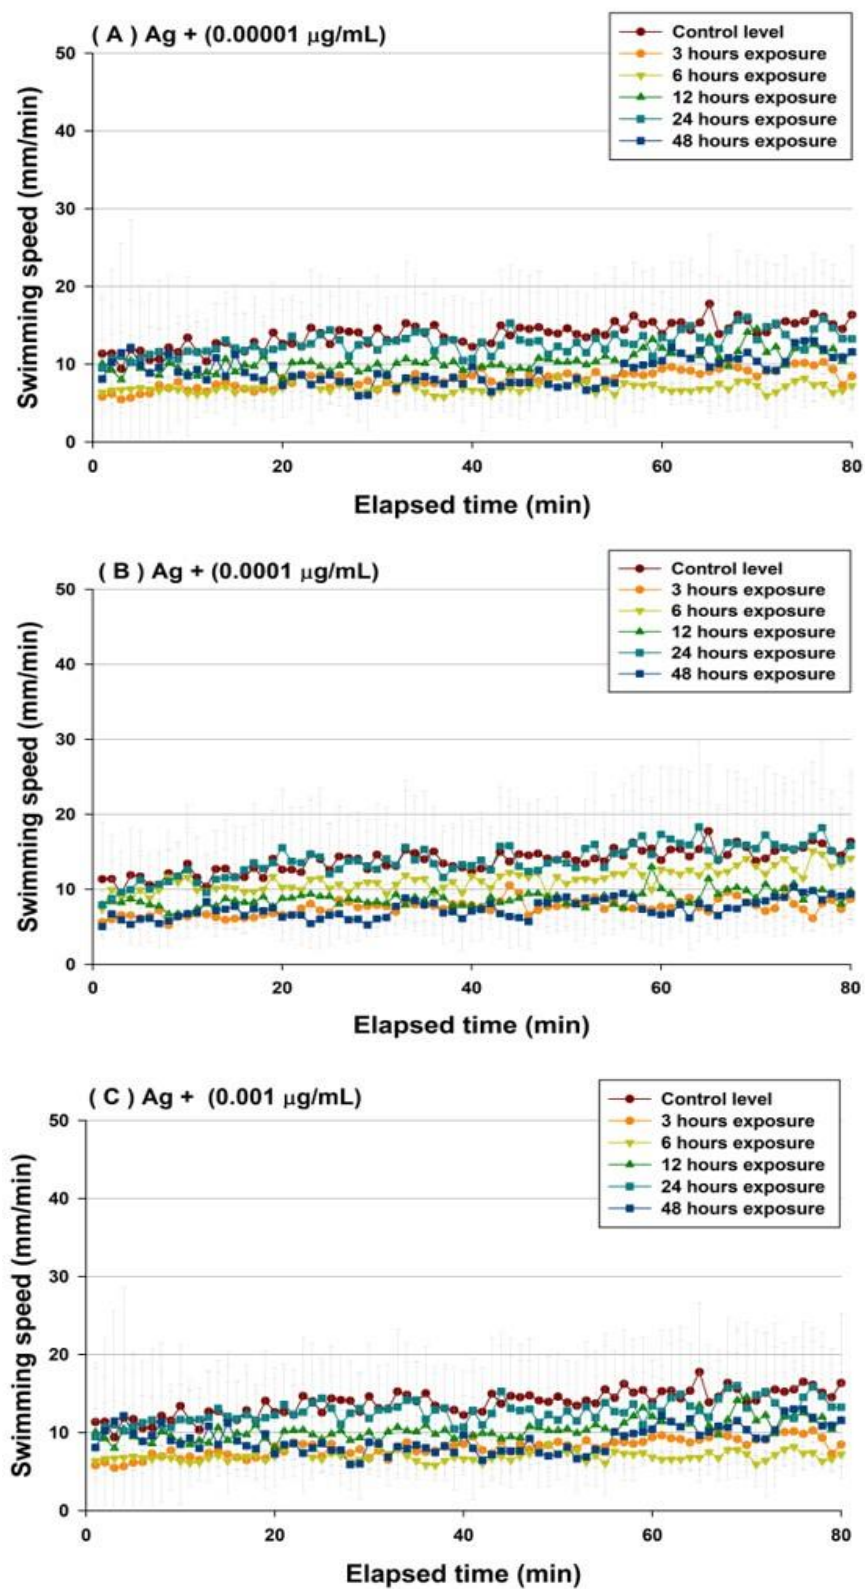

**Figure S3.** Temporal variation of swimming speed by silver ion ( $\text{Ag}^+$ ) level and exposure duration.
